# Supplementary material for: Extensive Recombination-driven Coronavirus Diversification Expands the Pool of Potential Pandemic Pathogens
Source: PubMed Central journal article supplement (PMC9730504; doi:10.1093/gbe/evac161), 2022-11-04
Supplement: evac161_supplementary_data.pdf [file evac161_supplementary_data.pdf]

| Accession Number | Virus                    | Accession Number | Virus              |
|------------------|--------------------------|------------------|--------------------|
| MK581202         | IBV/Poland/80/1989       | MN996532         | BtCoV/RaTG13       |
| KF294380         | RnCoV/Lucheng-19         | MN908947         | SARS-CoV-2         |
| MF577027         | PEDV/Belgorod/2008       | KJ473811         | BtCoV/RfJL2012     |
| AY567487         | HCoV-NL63                | MG772934         | BtCoV/ZXC21        |
| MN611517         | 229Er-CoV/Ra5425         | MG772933         | BtCoV/ZC45         |
| AF304460         | HCoV-229E                | KY417145         | BtCoV/Rf4092       |
| KJ473808         | BtCoV/RfYN2012           | KF367457         | BtCoV/WIV1         |
| MN611512         | HKU2r-BtCoV/160660       | AY278741         | SARS-CoV/Urbani    |
| NC_009988        | BtCoV/HKU2               | MT350598         | HKU9r-COV/GCCDC1   |
| MF094685         | SADSR-CoV/8462           | MG762674         | BtCoV/HKU9         |
| MF094687         | SADSR-CoV/141388         | AY700211         | MHV-A59            |
| MF094681         | SADS-CoV/FarmA           | KF686346         | HCoV-HKU1          |
| MF094688         | SADSR-CoV/162140         | NC_046954        | RfMfCoV-2/JL2014   |
| MF094686         | SADSR-CoV/8495           | MH687976         | VZ-BetaCoV/22084-1 |
| KC869678         | NeoCoV/PML-PHE-1/RSA2011 | NC_026011        | RnCoV/HKU24        |
| JX869059         | MERS_CoV                 | KY370052         | RtMmCoV-1/IM2014   |
| EF065505         | BtCoV/HKU4               | KY370044         | RtAsCoV/IM2014     |
| MH002342         | BtCoV/HKU5               | JN874559         | RbCoV/HKU14        |
| KY352407         | BtCoV/KY72               | DQ011855         | PHEV               |
| NC_014470        | BtCoV/BM48-31/BGR/2008   | AY391777         | HCoV-OC43          |
| EPI_ISL_410538   | PangolinCoV/GX17-P4L     | EF446615         | ECoV-NC99          |
| EPI_ISL_410721   | PangolinCoV/GD19         | MH043952         | BCoV               |
| EPI_ISL_412977   | BtCoV/RmYN02             |                  |                    |

**Figure S1. Accession numbers of viral sequences analyzed**

**A**

|             | BCoV  | HCoV-OC43 | PHEV  | ECoV-NC99 | RbCoV/HK... |
|-------------|-------|-----------|-------|-----------|-------------|
| BCoV        |       | 97.5%     | 97.3% | 97.8%     | 90.9%       |
| HCoV-OC43   | 97.5% |           | 97.7% | 96.8%     | 90.5%       |
| PHEV        | 97.3% | 97.7%     |       | 96.6%     | 90.7%       |
| ECoV-NC99   | 97.8% | 96.8%     | 96.6% |           | 90.3%       |
| RbCoV/HKU14 | 90.9% | 90.5%     | 90.7% | 90.3%     |             |

**B**

|          | 162140 | 141388 | HKU2  | FarmA | 8495  | 8462  | 160660 | RfYN2012 |
|----------|--------|--------|-------|-------|-------|-------|--------|----------|
| 162140   |        | 99.3%  | 97.6% | 99.5% | 99.3% | 97.6% | 95.3%  | 94.4%    |
| 141388   | 99.3%  |        | 97.8% | 99.2% | 98.8% | 98.0% | 95.3%  | 94.5%    |
| HKU2     | 97.6%  | 97.8%  |       | 97.6% | 97.4% | 98.4% | 95.1%  | 94.8%    |
| FarmA    | 99.5%  | 99.2%  | 97.6% |       | 99.1% | 97.7% | 95.1%  | 94.4%    |
| 8495     | 99.3%  | 98.8%  | 97.4% | 99.1% |       | 97.4% | 95.2%  | 94.3%    |
| 8462     | 97.6%  | 98.0%  | 98.4% | 97.7% | 97.4% |       | 94.9%  | 94.2%    |
| 160660   | 95.3%  | 95.3%  | 95.1% | 95.1% | 95.2% | 94.9% |        | 94.6%    |
| RfYN2012 | 94.4%  | 94.5%  | 94.8% | 94.4% | 94.3% | 94.2% | 94.6%  |          |

**C**

|                  | SARS-CoV-2 | RmYN02 | RaTG13 | PangolinC... |
|------------------|------------|--------|--------|--------------|
| SARS-CoV-2       |            | 98.4%  | 97.8%  | 91.3%        |
| RmYN02           | 98.4%      |        | 97.4%  | 91.4%        |
| RaTG13           | 97.8%      | 97.4%  |        | 90.7%        |
| PangolinCoV/GD19 | 91.3%      | 91.4%  | 90.7%  |              |

**Figure S2. Distance tables of full-length RdRp coding region of Orf1ab.** A) Distance table for *Betacoronavirus-1* RdRp sequences, as well as RbCoV/HKU14. B) Distance table for SADSr-CoV RdRp. C) Distance table for RdRp coding region of SARS-CoV-2-like viruses.

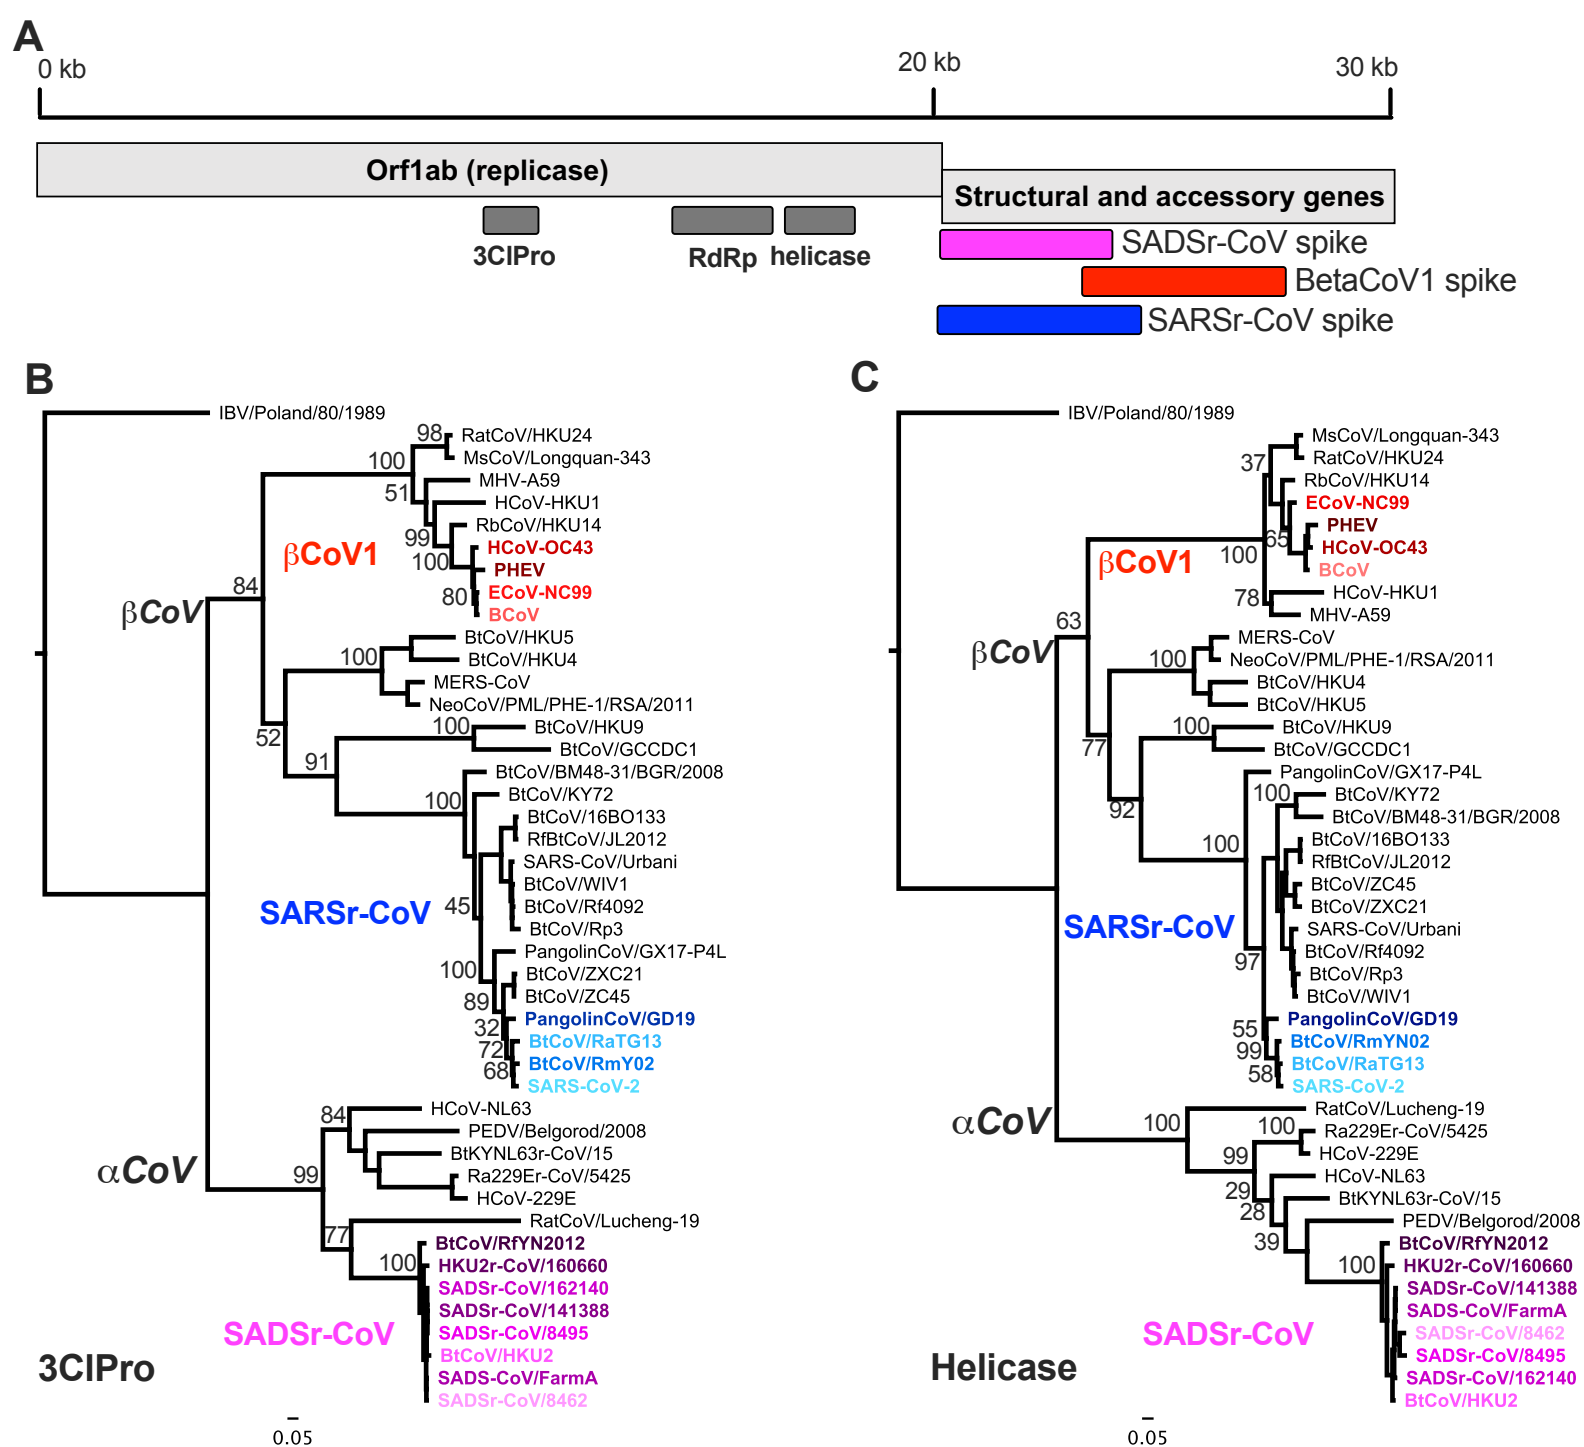

**Figure S3. 3CIPro and Helicase phylogenetic trees.** A) Schematic showing position of Orf1ab regions encoding 3CIPro, RdRp, and Helicase B) Maximum-likelihood phylogenetic tree of 3CIPro-encoding region. C) ML tree of helicase-encoding region of Orf1ab.

**A****3CIPro**

|             | BCoV  | HCoV-OC43 | PHEV  | ECoV-NC99 | RbCoV/HK... |
|-------------|-------|-----------|-------|-----------|-------------|
| BCoV        |       | 96.6%     | 95.3% | 99.2%     | 87.9%       |
| HCoV-OC43   | 96.6% |           | 94.7% | 96.7%     | 87.8%       |
| PHEV        | 95.3% | 94.7%     |       | 95.2%     | 86.7%       |
| ECoV-NC99   | 99.2% | 96.7%     | 95.2% |           | 88.1%       |
| RbCoV/HKU14 | 87.9% | 87.8%     | 86.7% | 88.1%     |             |

**B****Helicase**

|             | BCoV  | HCoV-OC43 | PHEV  | ECoV-NC99 | RbCoV/HK... |
|-------------|-------|-----------|-------|-----------|-------------|
| BCoV        |       | 97.4%     | 95.6% | 92.3%     | 88.6%       |
| HCoV-OC43   | 97.4% |           | 96.0% | 91.5%     | 88.5%       |
| PHEV        | 95.6% | 96.0%     |       | 90.3%     | 87.7%       |
| ECoV-NC99   | 92.3% | 91.5%     | 90.3% |           | 92.5%       |
| RbCoV/HKU14 | 88.6% | 88.5%     | 87.7% | 92.5%     |             |

**C****3CIPro**

|                  | SARS-CoV-2 | RmYN02 | RaTG13 | PangolinC... |
|------------------|------------|--------|--------|--------------|
| SARS-CoV-2       |            | 96.9%  | 95.9%  | 93.8%        |
| RmYN02           | 96.9%      |        | 95.8%  | 93.1%        |
| RaTG13           | 95.9%      | 95.8%  |        | 92.9%        |
| PangolinCoV/GD19 | 93.8%      | 93.1%  | 92.9%  |              |

**D****Helicase**

|                  | SARS-CoV-2 | RmYN02 | RaTG13 | PangolinC... |
|------------------|------------|--------|--------|--------------|
| SARS-CoV-2       |            | 97.5%  | 98.1%  | 92.2%        |
| RmYN02           | 97.5%      |        | 97.8%  | 92.1%        |
| RaTG13           | 98.1%      | 97.8%  |        | 92.2%        |
| PangolinCoV/GD19 | 92.2%      | 92.1%  | 92.2%  |              |

**E****3CIPro**

|              | 162140 | 141388 | HKU2  | FarmA | 8495  | 8462  | BtCoV/16... | RfYN2012 |
|--------------|--------|--------|-------|-------|-------|-------|-------------|----------|
| 162140       |        | 99.8%  | 98.8% | 99.3% | 99.9% | 99.3% | 97.0%       | 95.6%    |
| 141388       | 99.8%  |        | 98.7% | 99.1% | 99.9% | 99.1% | 97.0%       | 95.4%    |
| HKU2         | 98.8%  | 98.7%  |       | 98.6% | 98.8% | 98.6% | 96.6%       | 95.3%    |
| FarmA        | 99.3%  | 99.1%  | 98.6% |       | 99.2% | 99.8% | 97.2%       | 95.5%    |
| 8495         | 99.9%  | 99.9%  | 98.8% | 99.2% |       | 99.2% | 97.1%       | 95.5%    |
| 8462         | 99.3%  | 99.1%  | 98.6% | 99.8% | 99.2% |       | 97.2%       | 95.5%    |
| BtCoV/160660 | 97.0%  | 97.0%  | 96.6% | 97.2% | 97.1% | 97.2% |             | 95.3%    |
| RfYN2012     | 95.6%  | 95.4%  | 95.3% | 95.5% | 95.5% | 95.5% | 95.3%       |          |

**F****Helicase**

|              | 162140 | 141388 | FarmA | HKU2  | 8495  | 8462  | BtCoV/16... | RfYN2012 |
|--------------|--------|--------|-------|-------|-------|-------|-------------|----------|
| 162140       |        | 99.0%  | 99.1% | 98.7% | 95.6% | 96.2% | 95.1%       | 93.9%    |
| 141388       | 99.0%  |        | 99.8% | 98.4% | 96.3% | 96.3% | 95.1%       | 93.5%    |
| FarmA        | 99.1%  | 99.8%  |       | 98.4% | 96.2% | 96.4% | 95.1%       | 93.4%    |
| HKU2         | 98.7%  | 98.4%  | 98.4% |       | 95.9% | 96.3% | 95.6%       | 94.3%    |
| 8495         | 95.6%  | 96.3%  | 96.2% | 95.9% |       | 96.4% | 94.1%       | 93.1%    |
| 8462         | 96.2%  | 96.3%  | 96.4% | 96.3% | 96.4% |       | 94.1%       | 93.1%    |
| BtCoV/160660 | 95.1%  | 95.1%  | 95.1% | 95.6% | 94.1% | 94.1% |             | 94.5%    |
| RfYN2012     | 93.9%  | 93.5%  | 93.4% | 94.3% | 93.1% | 93.1% | 94.5%       |          |

**Figure S4. 3CIPro and Helicase genetic distance tables.** A and B) Distance tables for BetaCoV1 viruses. C and D) Distance tables for SARS-CoV-2-like viruses. E and F) Distance tables for SADSr-CoVs.

**A**

| Region               | Position (in native sequence) | % identity to reference | Top BLAST hit (% identity)                        |
|----------------------|-------------------------------|-------------------------|---------------------------------------------------|
| PangolinCoV/GD19 RR1 | 21,431-22,321                 | 64.2%                   | <a href="#">MG772934.1</a> – BtCoV/ZXC21 (80.4%)  |
| BtCoV/RmYN02 RR1     | 21,424-24,102                 | 62.5%                   | <a href="#">KY417145.1</a> – BtCoV/Rf4092 (73.8%) |
| BtCoV/RmYN02 RR2     | 27,700-28,078                 | 51.9%                   | <a href="#">AY515512.1</a> – civetSARS-CoV (81%)  |

**B**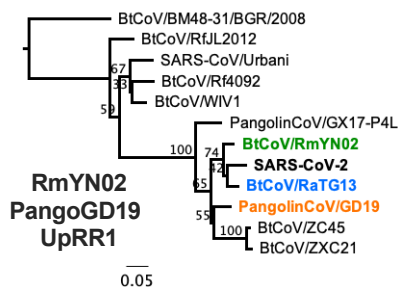

|                  | SARS-CoV-2 | BtCoV/Rm... | BtCoV/Ra... | PangolinC... |
|------------------|------------|-------------|-------------|--------------|
| SARS-CoV-2       |            | 94.6%       | 95.0%       | 93.0%        |
| BtCoV/RmYN02     | 94.6%      |             | 95.6%       | 92.8%        |
| BtCoV/RaTG13     | 95.0%      | 95.6%       |             | 92.8%        |
| PangolinCoV/GD19 | 93.0%      | 92.8%       | 92.8%       |              |

**C**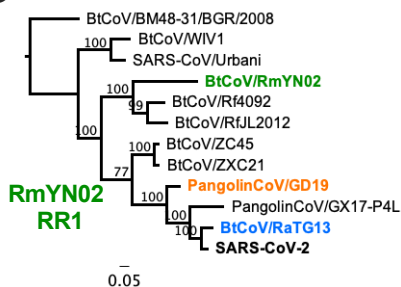

|                  | SARS-CoV-2 | BtCoV/Rm... | BtCoV/Ra... | PangolinC... |
|------------------|------------|-------------|-------------|--------------|
| SARS-CoV-2       |            | 62.5%       | 91.9%       | 81.3%        |
| BtCoV/RmYN02     | 62.5%      |             | 92.2%       | 62.5%        |
| BtCoV/RaTG13     | 91.9%      | 62.2%       |             | 80.2%        |
| PangolinCoV/GD19 | 81.3%      | 62.5%       | 80.2%       |              |

**D**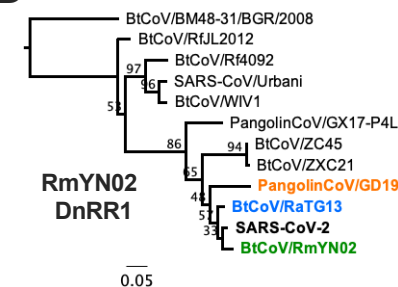

|                  | SARS-CoV-2 | BtCoV/Rm... | BtCoV/Ra... | PangolinC... |
|------------------|------------|-------------|-------------|--------------|
| SARS-CoV-2       |            | 95.8%       | 98.0%       | 97.0%        |
| BtCoV/RmYN02     | 95.8%      |             | 95.8%       | 94.8%        |
| BtCoV/RaTG13     | 98.0%      | 95.8%       |             | 97.2%        |
| PangolinCoV/GD19 | 97.0%      | 94.8%       | 97.2%       |              |

**E**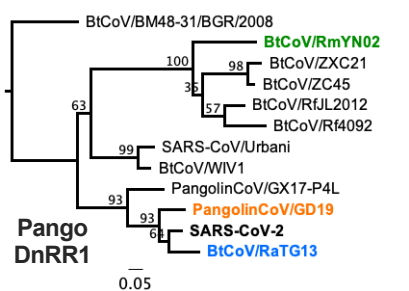

|                  | SARS-CoV-2 | BtCoV/Rm... | BtCoV/Ra... | PangolinC... |
|------------------|------------|-------------|-------------|--------------|
| SARS-CoV-2       |            | 65.6%       | 88.4%       | 87.4%        |
| BtCoV/RmYN02     | 65.6%      |             | 64.2%       | 63.6%        |
| BtCoV/RaTG13     | 88.4%      | 64.2%       |             | 84.6%        |
| PangolinCoV/GD19 | 87.4%      | 63.6%       | 84.6%       |              |

**F**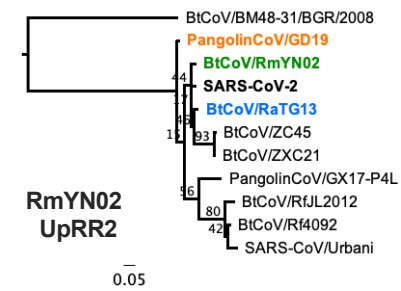

|                  | SARS-CoV-2 | BtCoV/Rm... | BtCoV/Ra... | PangolinC... |
|------------------|------------|-------------|-------------|--------------|
| SARS-CoV-2       |            | 96.8%       | 96.4%       | 93.4%        |
| BtCoV/RmYN02     | 96.8%      |             | 96.0%       | 93.4%        |
| BtCoV/RaTG13     | 96.4%      | 96.0%       |             | 92.2%        |
| PangolinCoV/GD19 | 93.4%      | 93.4%       | 92.2%       |              |

**G**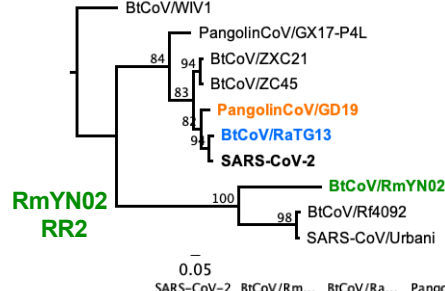

|                  | SARS-CoV-2 | BtCoV/Rm... | BtCoV/Ra... | PangolinC... |
|------------------|------------|-------------|-------------|--------------|
| SARS-CoV-2       |            | 51.9%       | 97.1%       | 92.1%        |
| BtCoV/RmYN02     | 51.9%      |             | 52.4%       | 50.9%        |
| BtCoV/RaTG13     | 97.1%      | 52.4%       |             | 91.9%        |
| PangolinCoV/GD19 | 92.1%      | 50.9%       | 91.9%       |              |

**H**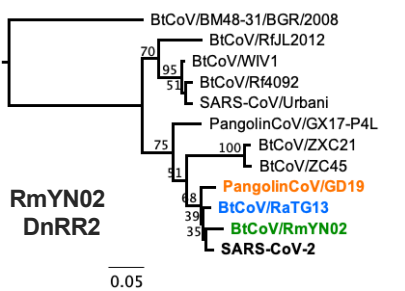

|                  | SARS-CoV-2 | BtCoV/Rm... | BtCoV/Ra... | PangolinC... |
|------------------|------------|-------------|-------------|--------------|
| SARS-CoV-2       |            | 95.8%       | 98.0%       | 97.0%        |
| BtCoV/RmYN02     | 95.8%      |             | 95.8%       | 94.8%        |
| BtCoV/RaTG13     | 98.0%      | 95.8%       |             | 97.2%        |
| PangolinCoV/GD19 | 97.0%      | 94.8%       | 97.2%       |              |

**Figure S5. Breakpoint and phylogenetic analysis of SARSr-CoV.** A. Table showing boundaries of divergent recombinant regions in PangolinCoV/GD19 and BtCoV/RmYN02 with nucleotide identity to SARS-CoV-2 and the top BLAST hit in GenBank. B-H) Maximum-likelihood phylogenetic trees of breakpoint-defined regions in PangolinCoV/GD19 and BtCoV/RmYN02, demonstrating changes in topology due to recombination. “Up” and “Dn” regions reflect the 500 nt upstream and downstream of 5’ and 3’ breakpoints, respectively.

**A**

| Region  | Position (in native sequence) | % identity to reference | Top BLAST hit (% identity)                      |
|---------|-------------------------------|-------------------------|-------------------------------------------------|
| ECoV R2 | 330-6,752                     | 75.4                    | <a href="#">JN874560.1</a> - RbCoV/HKU14 (80.9) |
| ECoV R4 | 17,025-20,320                 | 87.8                    | <a href="#">JN874561.1</a> - RbCoV/HKU14 (91.3) |
| ECoV R6 | 21,496-27,145                 | 75.8                    | <a href="#">LC494155.1</a> - BCoV (76.5)        |
| PHEV RR | 23,219-25,931                 | 77.1                    | <a href="#">LC494159.1</a> - BCoV (77.8)        |

**B**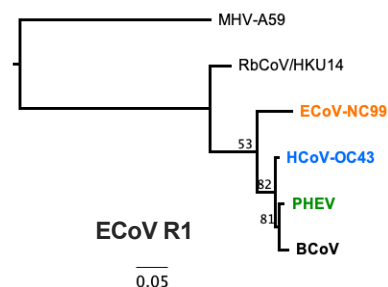**C**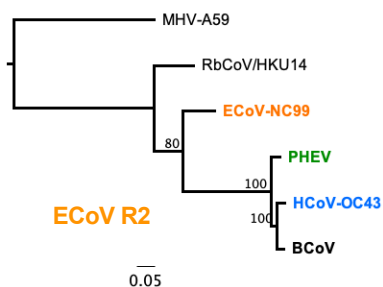**D**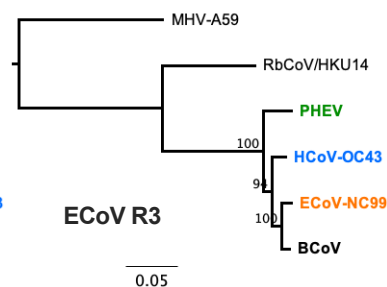**E**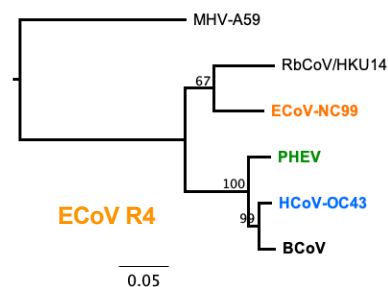**F**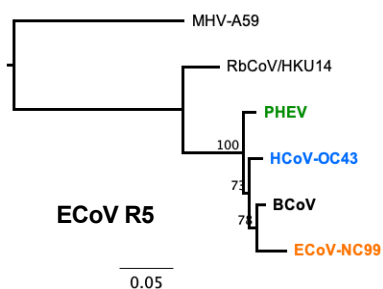**G**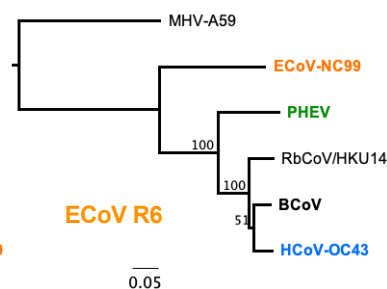**H**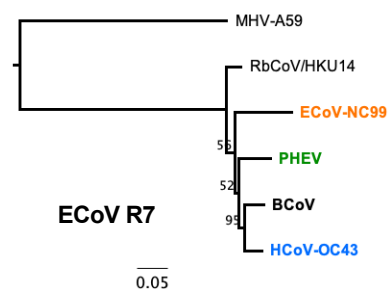**I**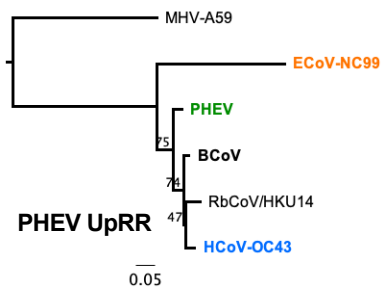**J**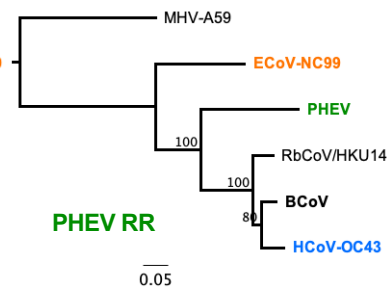**K**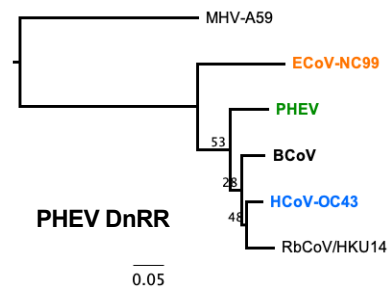

**Figure S6. Breakpoint and phylogenetic analysis of *Betacoronavirus-1*.** A. Table showing boundaries of divergent recombinant regions in ECoV and PHEV with nucleotide identity to BCoV and the top BLAST hit in GenBank. B-H) Maximum-likelihood phylogenetic trees of breakpoint-defined regions in ECoV. I-K) ML-phylogenetic trees of PHEV-RR and 500 nucleotide stretches flanking the 5' and 3' breakpoints. ECoV and PHEV regions in black type are conserved among *BetaCoV1* (not of recombinant origin) and demonstrate changes in tree topology and/or branch length due to recombination.

**A**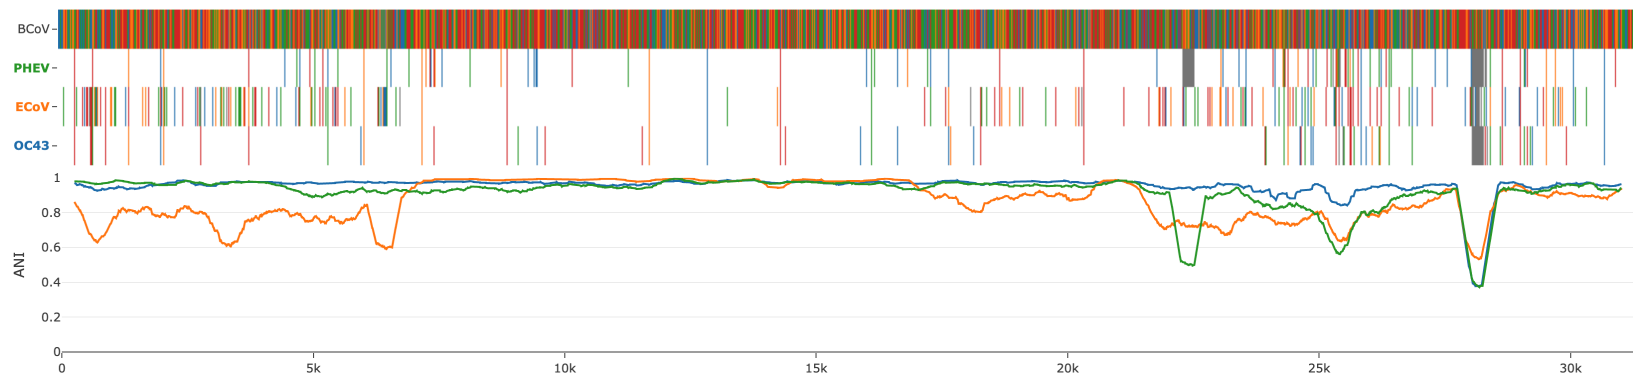**B**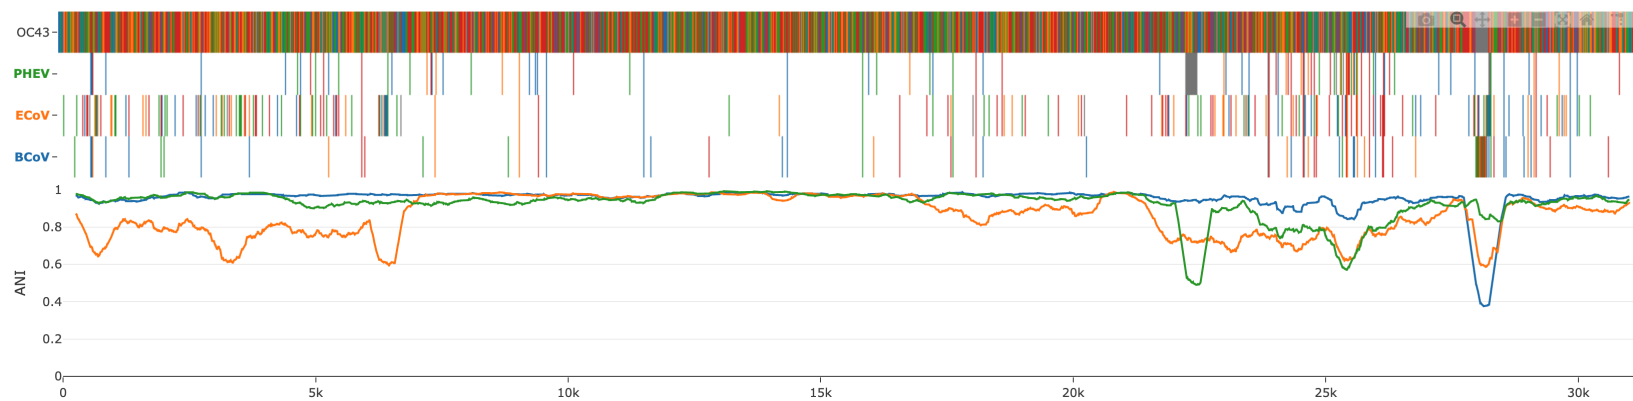

**Figure S7. BetaCoV-1 IDPlot results with alternative reference sequences.** A) The IDPlot output for *Betacoronavirus-1* displayed in Figure 4 of the main text. B) The IDPlot output from a run using the same sequences but with OC43 as the reference rather than BCov.

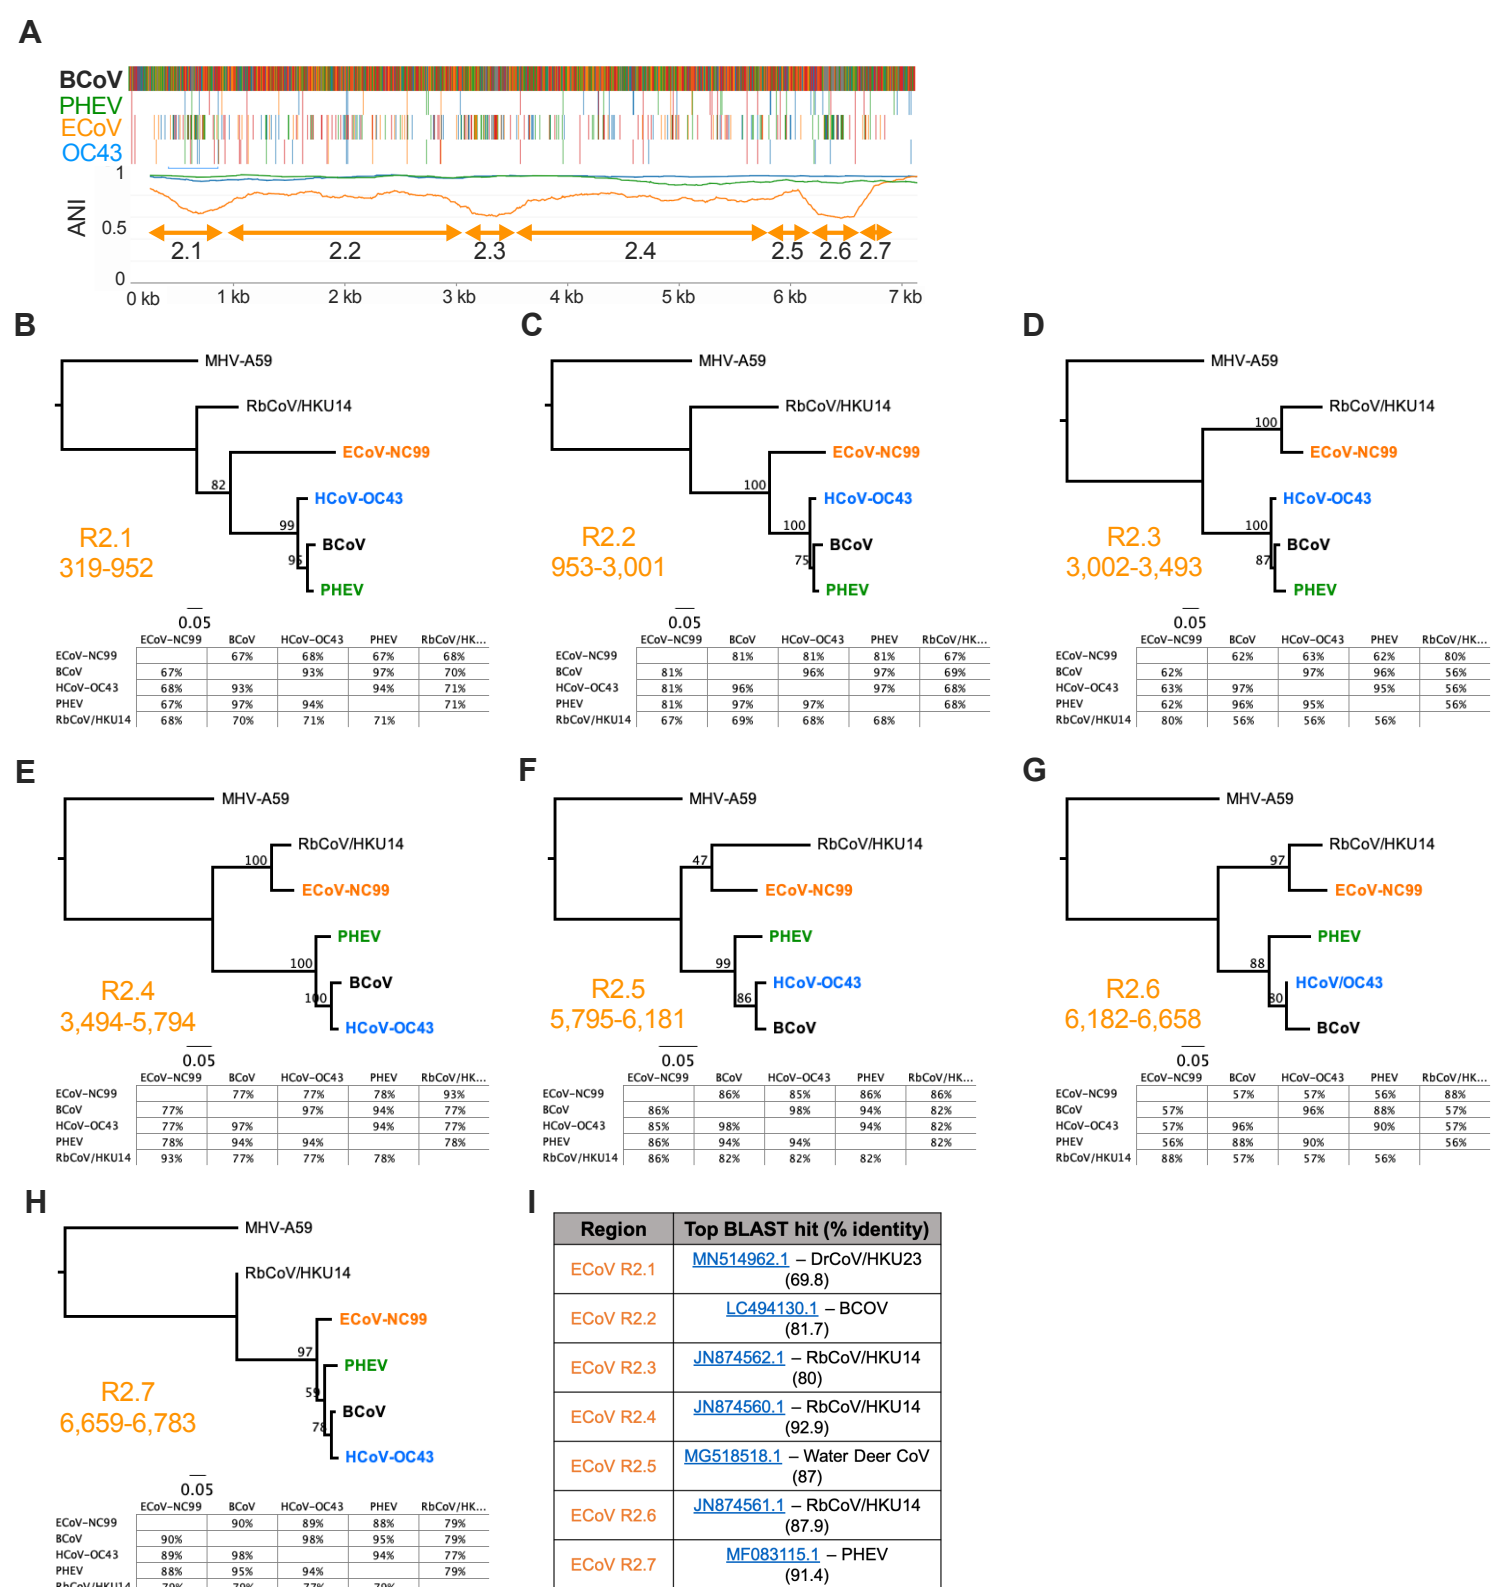

**Figure S8. Recombination analysis of ECoV R2.** A) IDPlot of ECoV Region 2 B-H) ML phylogenetic trees and distance tables for each putative sub-region of ECoV R2. I) BLAST analysis of ECoV R2 sub-regions.



**A**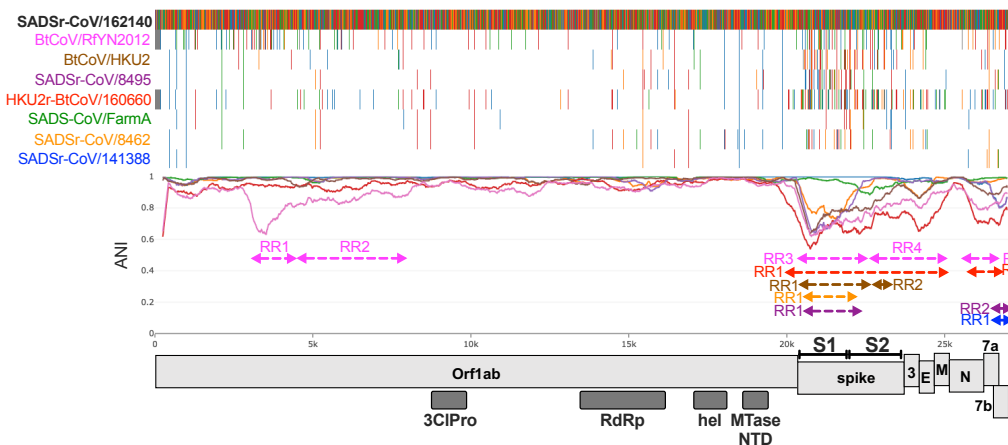**B**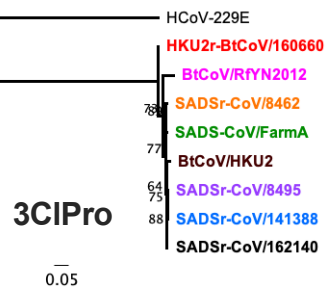**C**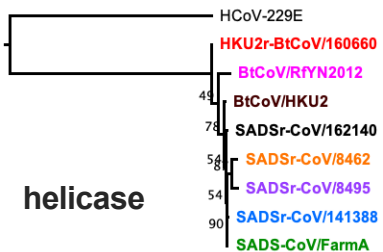**D**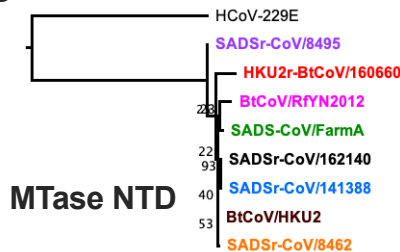**E**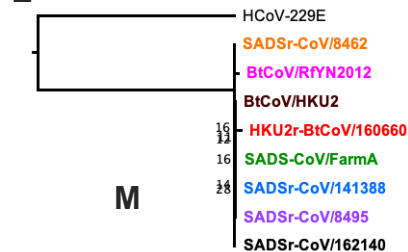**F**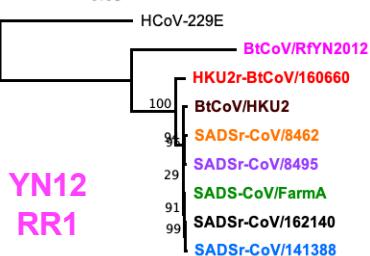**G**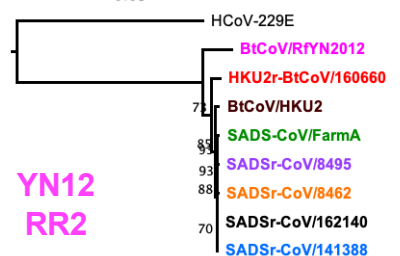**H**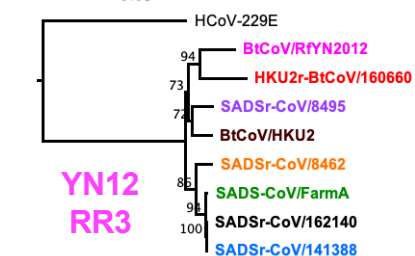**I**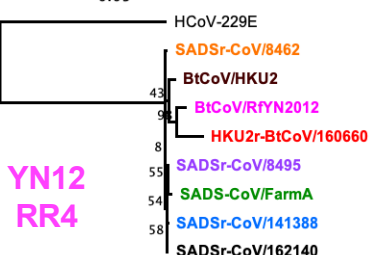**J**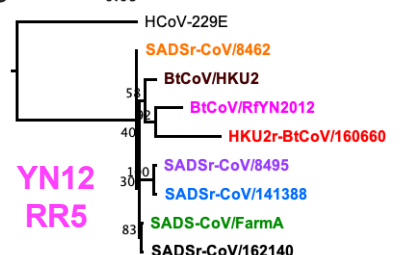**K**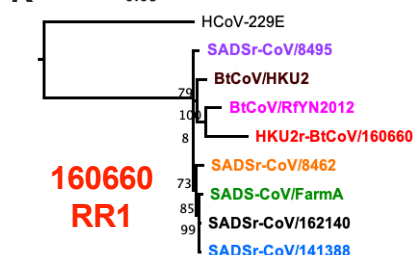**L**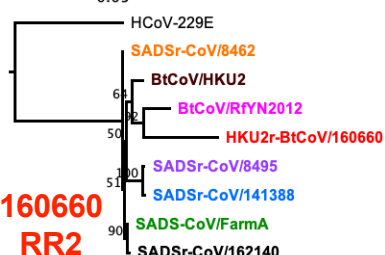**M**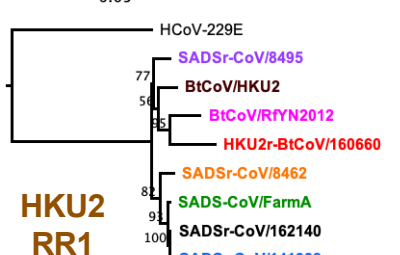**N**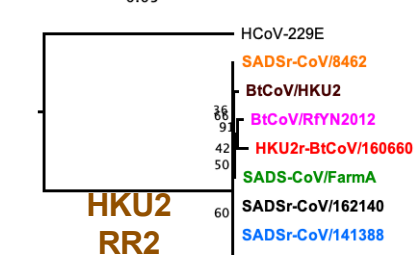**O**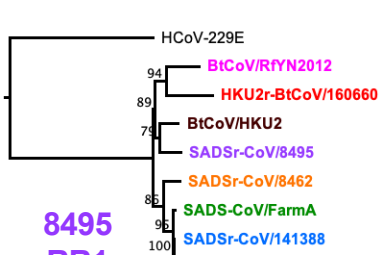**P**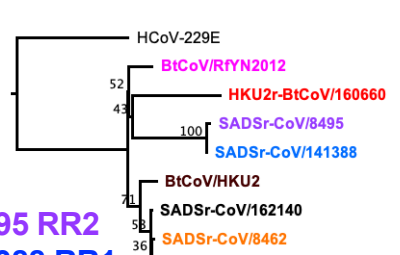**Q**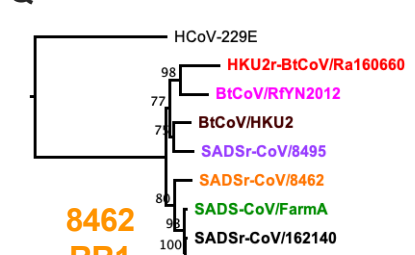

**Figure S9. Phylogenetic analysis of SADSr-CoV recombination.** A) ANI plot of SADSr-CoVs including indication of recombinant regions identified by GARD and validated by our phylogenetic analysis. B-D) Maximum likelihood phylogenetic trees of conserved (non-recombinant origin) SADSr-CoV regions. MTase NTD is the furthest 3' region upstream of the first breakpoint surrounding SADSr-CoV spikes. M is downstream of several recombinant regions and upstream of recombinant regions encompassing 3' structural and accessory genes. E-Q) ML phylogenetic analysis of SADSr-CoV recombinant regions.

A

| Region               | Position (in native sequence) | % identity to reference | BLAST hits (% identity)                                                                                                                                                                                                                                                                   |
|----------------------|-------------------------------|-------------------------|-------------------------------------------------------------------------------------------------------------------------------------------------------------------------------------------------------------------------------------------------------------------------------------------|
| RfYN2012 RR1         | 2,854-3,657                   | 67.5%                   | <a href="#">MF094687.1</a> – SADSr-CoV/141388 (69%)                                                                                                                                                                                                                                       |
| RfYN2012 RR2         | 3,658-8,017                   | 85.6%                   | <a href="#">MK994935.1</a> – SADS-CoV/GDWT-P18 (85.9%)                                                                                                                                                                                                                                    |
| RfYN2012 RR3         | 20,287-22,002                 | 67%                     | <a href="#">MF769424.1</a> – SADS-CoV/182 (69.1%)                                                                                                                                                                                                                                         |
| RfYN2012 RR4         | 22,003-23,800                 | 80.5%                   | <a href="#">EF203065.1</a> – BtCoV/HKU2-HK (81.3%)                                                                                                                                                                                                                                        |
| RfYN2012 RR5         | 25,318-26,693                 | 82.7%                   | <a href="#">MF094685.1</a> – SADSr-CoV/8462 (83.7%)                                                                                                                                                                                                                                       |
| BtCoV/160660 RR1     | 19,807-24,631                 | 69.5%                   | <a href="#">EF203065.1</a> – BtCoV/HKU2-HK (71.5%)                                                                                                                                                                                                                                        |
| BtCoV/160660 RR2     | 25,547-26,738                 | 71.9%                   | <a href="#">MF094688.1</a> – SADSr-CoV/162140 (71.9%)                                                                                                                                                                                                                                     |
| BtCoV/HKU2 RR1       | 20,489-22,496                 | 73.9%                   | <a href="#">MF769407.1*</a> - SADSr-CoV/141194 (99.8%)<br><a href="#">EF203065.1</a> – BtCoV/HKU2-HK (98.8%)<br><a href="#">MF769415.1*</a> – SADSr-CoV/NL140388 (98.6%)<br><a href="#">MF769414.1*</a> – SADSr-CoV/140344 (96.4%)<br><a href="#">MF094686.1</a> – SADSr-CoV/8495 (75.6%) |
| BtCoV/HKU2 RR2       | 22,497-23,252                 | 86.2%                   | <a href="#">EF203067.1</a> – BtCoV/HKU2-HK (89.1%)<br><a href="#">MF094688.1</a> – SADSr-CoV/162140 (86.2%)                                                                                                                                                                               |
| SADSr-CoV/8462 RR1   | 20,530-22,044                 | 77.3%                   | <a href="#">MF094700.1*</a> – SADSr-CoV/HD13590 (99.9%)<br><a href="#">MF094697.1*</a> – SADSr-CoV/8355 (98.6%)<br><a href="#">MF094691.1*</a> – SADSr-CoV/8462 (96.8%)<br><a href="#">MK977618.1</a> – SADS-CoV/p10 (78%)                                                                |
| SADSr-CoV/8495 RR1   | 20,501-22,167                 | 71.4%                   | <a href="#">MF094689.1*</a> – SADSr-CoV/8495 (84.5%)<br><a href="#">EF203065.1</a> – BtCoV/HKU2-HK (75.2%)                                                                                                                                                                                |
| SADSr-CoV/8495 RR2   | 26,653-26,942                 | 70.7%                   | <a href="#">MF094687.1</a> – SADSr-CoV/141388 (98.6%)<br><a href="#">MK994935.1</a> – SADS-CoV/GDWT-p18 (75.7%)                                                                                                                                                                           |
| SADSr-CoV/141388 RR1 | 26,629-26,918                 | 71.4%                   | <a href="#">MF094686.1</a> - SADSr-CoV/8495 (98.6%)<br><a href="#">MK994935.1</a> – SADS-CoV/GDWT-p18 (74.8%)                                                                                                                                                                             |

B

## MTase NTD

|              | 162140 | 141388 | FarmA | HKU2  | 8495  | 8462  | BtCoV/16... | RfYN2012 |
|--------------|--------|--------|-------|-------|-------|-------|-------------|----------|
| 162140       |        | 100%   | 97.7% | 99.2% | 96.7% | 99.0% | 93.6%       | 96.2%    |
| 141388       | 100%   |        | 97.7% | 99.2% | 96.7% | 99.0% | 93.6%       | 96.2%    |
| FarmA        | 97.7%  | 97.7%  |       | 98.5% | 95.7% | 98.2% | 93.6%       | 96.2%    |
| HKU2         | 99.2%  | 99.2%  | 98.5% |       | 96.9% | 99.7% | 94.4%       | 96.4%    |
| 8495         | 96.7%  | 96.7%  | 95.7% | 96.9% |       | 96.7% | 93.1%       | 95.2%    |
| 8462         | 99.0%  | 99.0%  | 98.2% | 99.7% | 96.7% |       | 94.1%       | 96.2%    |
| BtCoV/160660 | 93.6%  | 93.6%  | 93.6% | 94.4% | 93.1% | 94.1% |             | 92.3%    |
| RfYN2012     | 96.2%  | 96.2%  | 96.2% | 96.4% | 95.2% | 96.2% | 92.3%       |          |

C

## M

|              | 162140 | 141388 | FarmA | HKU2  | 8495  | 8462  | BtCoV/16... | RfYN2012 |
|--------------|--------|--------|-------|-------|-------|-------|-------------|----------|
| 162140       |        | 97.7%  | 97.7% | 98.3% | 98.1% | 99.0% | 89.7%       | 91.4%    |
| 141388       | 97.7%  |        | 98.8% | 97.2% | 97.4% | 96.7% | 90.1%       | 91.6%    |
| FarmA        | 97.7%  | 98.8%  |       | 96.7% | 97.4% | 97.0% | 90.1%       | 91.8%    |
| HKU2         | 98.3%  | 97.2%  | 96.7% |       | 97.7% | 97.5% | 89.1%       | 91.9%    |
| 8495         | 98.1%  | 97.4%  | 97.4% | 97.7% |       | 97.4% | 89.0%       | 91.4%    |
| 8462         | 99.0%  | 96.7%  | 97.0% | 97.5% | 97.4% |       | 89.4%       | 91.9%    |
| BtCoV/160660 | 89.7%  | 90.1%  | 90.1% | 89.1% | 89.0% | 89.4% |             | 87.0%    |
| RfYN2012     | 91.4%  | 91.6%  | 91.8% | 91.9% | 91.4% | 91.9% | 87.0%       |          |

**Figure S10. Breakpoint and nucleotide identity analysis of SADSr-CoV recombination.** A) Breakpoint analysis of SADSr-CoVs including nucleotide identity to reference sequence and top BLAST hits. BLAST result accession numbers with an asterisk indicate the entry is a partial spike sequence only. B -C) Distance tables for MTase NTD, and M genes shows high nucleotide identity across SADSr-CoVs upstream and downstream of spike-encompassing recombinant regions.

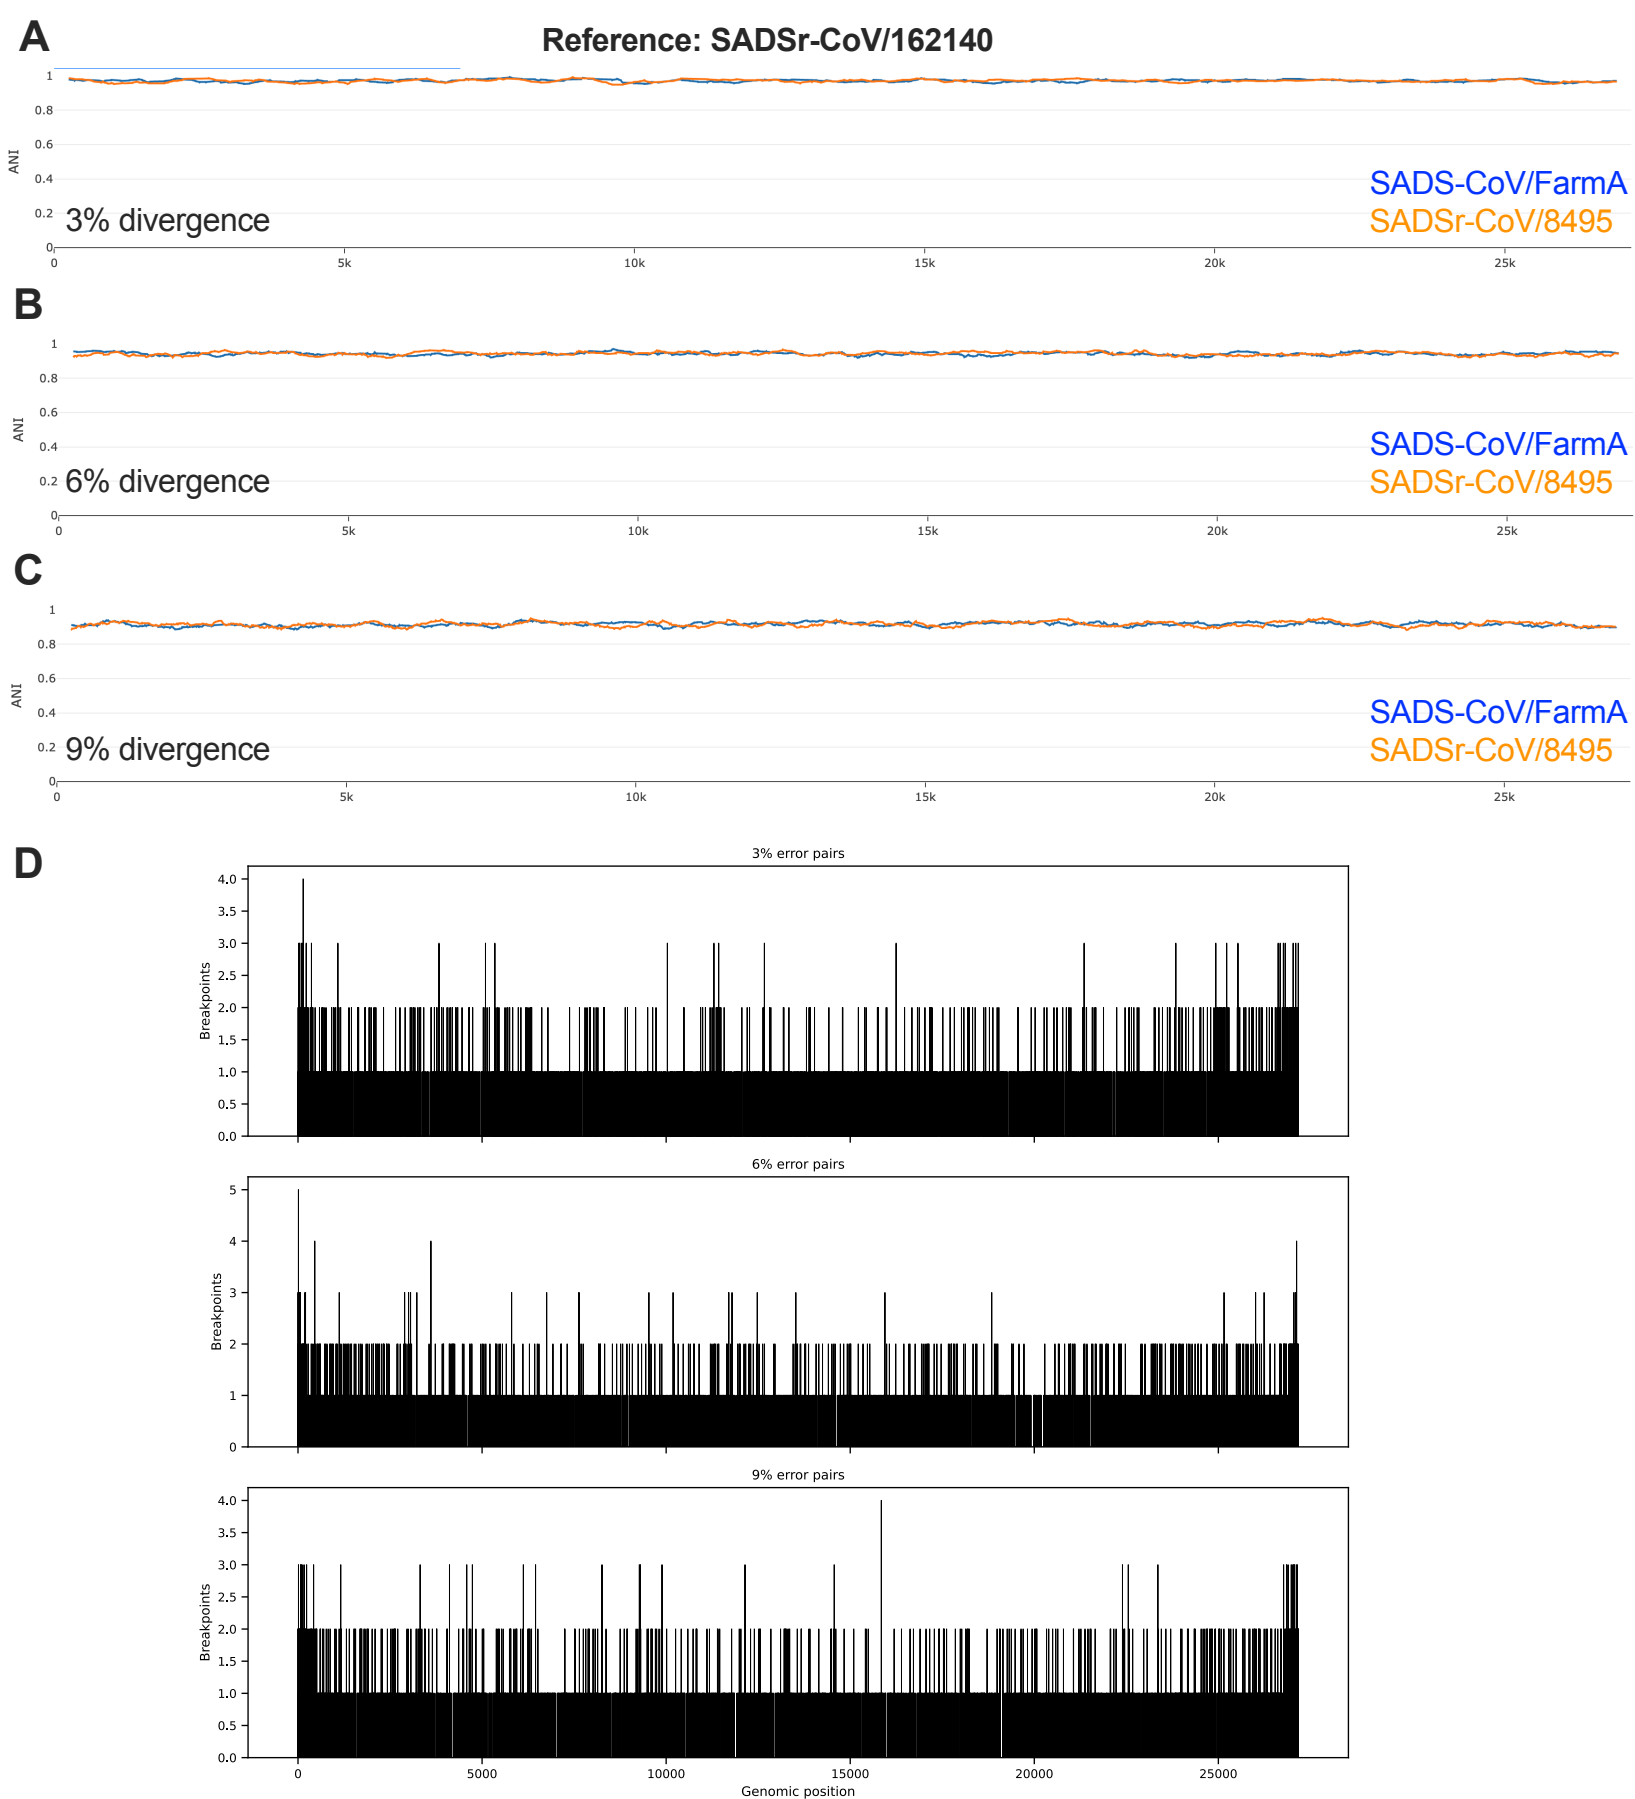

**Figure S11. GARD Simulations.** A-C) ANI plots showing sequence divergence at 3%, 6%, or 9% randomly introduced error rates D) Histograms showing even breakpoint distribution for each simulation.
